# Supplementary material for: Adhesion forces and mechanics in mannose-mediated acanthamoeba interactions
Source: PubMed Central journal article supplement (PMC5417443; doi:10.1371/journal.pone.0176207), 2017-05-04
Supplement: pone.0176207.s002.pdf [file pone.0176207.s002.pdf]

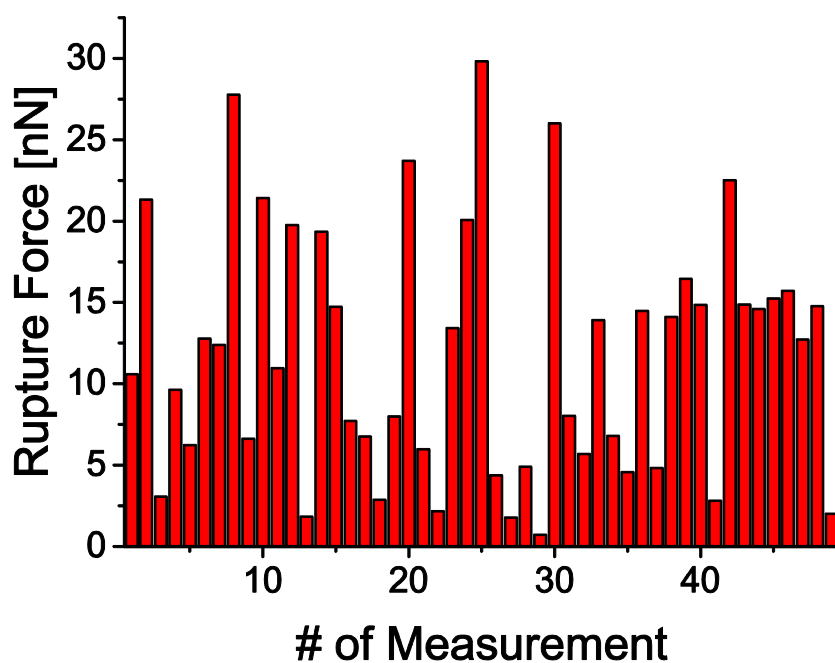

**Figure S2: Mannose functionalization of the cantilever does not alter with time.** The measured rupture forces are plotted versus the number of force curves that already were recorded with the utilized cantilever. 56 curves, which were recorded on one cell with 10 s contact time, were taken into account. This is the maximum amount of time a cantilever has been used on one cell during this study. The data do not show a decline of rupture forces with time for these 56 curves.
