# Supplementary material for: Adhesion forces and mechanics in mannose-mediated acanthamoeba interactions
Source: PLOS journal article supplement (doi:10.1371/journal.pone.0176207), 2017-05-04
Supplement: S1 (10.1371/journal.pone.0176207.s001) [file journal.pone.0176207.s001]

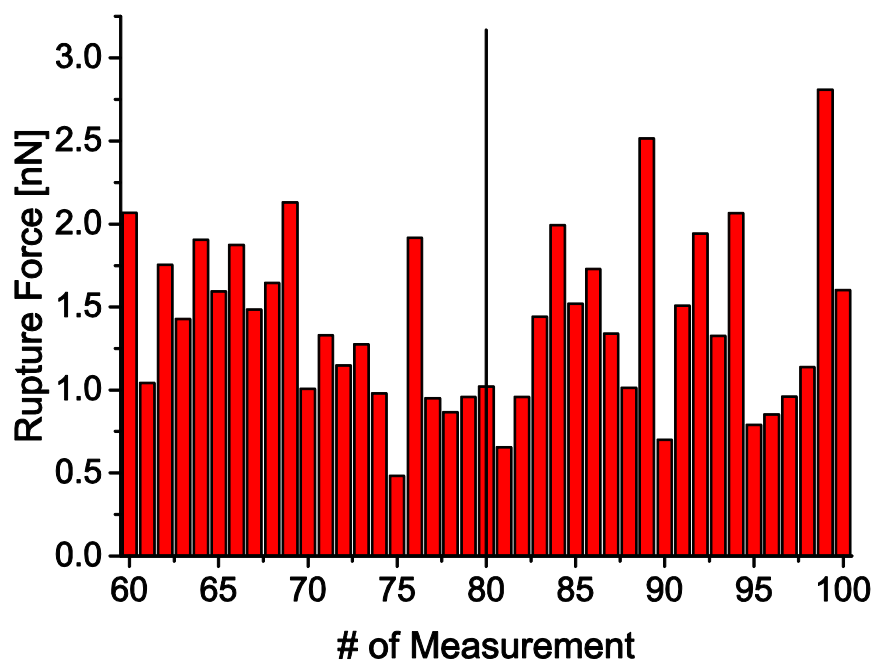

**Figure S1: Different force setpoints did not significantly change the measured rupture forces.** The measured rupture forces are plotted versus the number of measurement. After force curve 80 (marked with the horizontal line) the cantilever was changed. This lead to a change of the force setpoint from 19 nN to 11 nN. However, a change of measured rupture forces was not observed.
